# Supplementary material for: Cefuroxime derived copper nanoparticles and their application as a colorimetric sensor for trace level detection of picric acid
Source: Royal Society of Chemistry journal article supplement (doi:10.1039/c6ra08571g), 2016-01-01
Supplement: c6ra08571g1.pdf [file c6ra08571g1.pdf]

## Supplementary Information

### Cefuroxime derived copper nanoparticles and their application as colorimetric sensor for trace level detection of picric acid

Masood Hussain<sup>a</sup>, Ayman Nafady<sup>b, c</sup>, Sirajuddin<sup>a, \*</sup>, Syed Tufail Hussain Sherazi<sup>a</sup>, Muhammad Raza Shah<sup>d</sup>, Ali Alsalmeh<sup>b</sup>, Muhammad Siddique Kalhor<sup>e</sup>, Sarfaraz Ahmad Mahesar<sup>a</sup>, Samia Siddiqui<sup>a</sup>

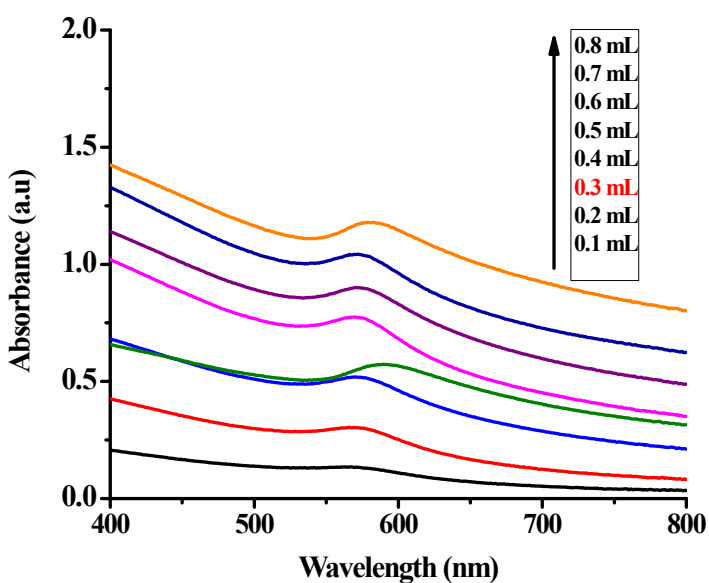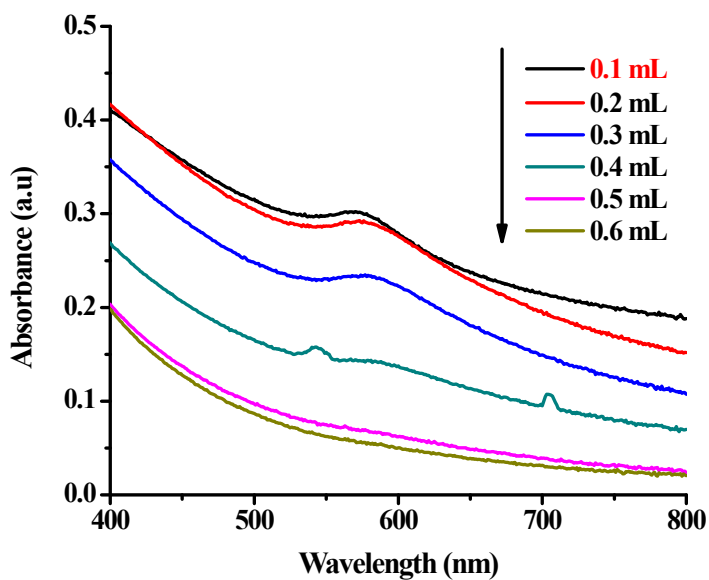

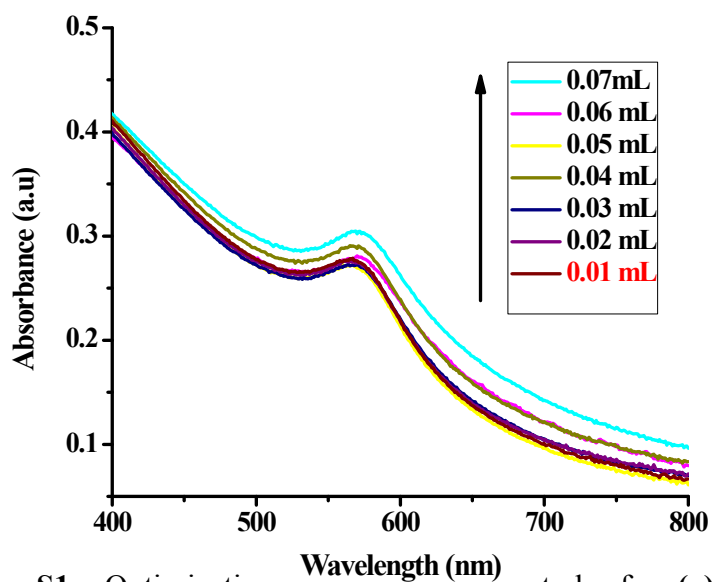

**Figure S1.** Optimization study for (a) effect of precursor salt 0.01M  $\text{CuCl}_2 \cdot 5\text{H}_2\text{O}$ ; (b) effect of reducing agent (0.1M  $\text{NaBH}_4$ ) and (c) effect of capping agent (Cefuroxime, 0.01 M  $\text{C}_{16}\text{H}_{16}\text{N}_4\text{O}_8\text{S}$ ) on the formation of CuNPs.

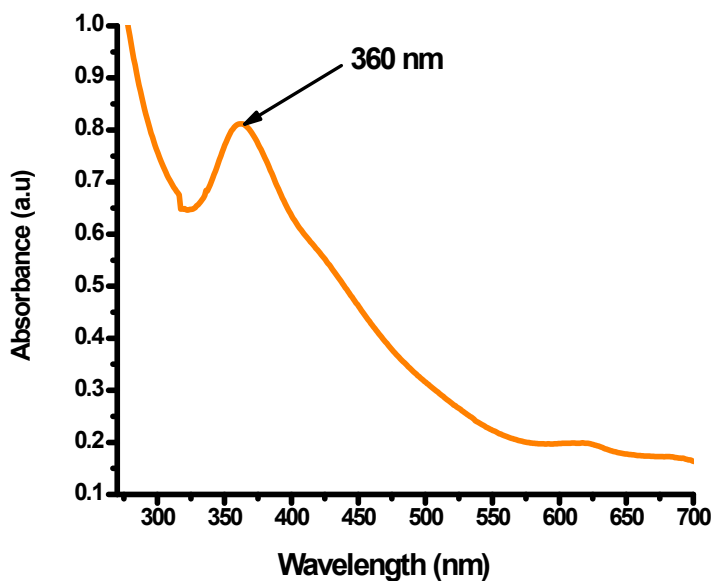

**Figure S2.** UV-Vis spectrum of mixing 0.01 M solution of Cefuroxime and 0.01 M solution of picric acid
